# Supplementary material for: Determination of Ru and Os with enhanced sensitivity and Rh, Pd, Pt and Ir at sub ng g−1 levels in geological samples by ICP-MS
Source: Royal Society of Chemistry journal article supplement (doi:10.1039/d4ja00383g), 2025-01-01
Supplement: d4ja00383g1.pdf [file d4ja00383g1.pdf]

# **Determination of Ru and Os with enhanced sensitivity and Rh, Pd, Pt and Ir at sub ng g<sup>-1</sup> levels in geological samples by ICP-MS**

Qishuai Huang\*, Yali Sun\* and Shouqian Zhao

State Key Laboratory of Tibetan Plateau Earth System, Environment and Resources, Institute of Tibetan Plateau Research, Chinese Academy of Sciences, Beijing 100101, China

\*Corresponding authors: [huangqihuai@itpcas.ac.cn](mailto:huangqihuai@itpcas.ac.cn); [yalisun@itpcas.ac.cn](mailto:yalisun@itpcas.ac.cn)

## **Contents**

1. Fig. S1 The dependence of the error magnification (F) on isotope dilution ratio (R)
2. Table S1 Procedural recovery (%) of PGE analytes
3. Table S2 Procedural blanks (ng) of PGE analytes
4. Table S3 Measured isotope ratios, error magnification (F) values, blank correction and relative uncertainties in ratio measurements and PGE contents for reference materials
5. The detailed calculation process for Rh contents

Fig. S1

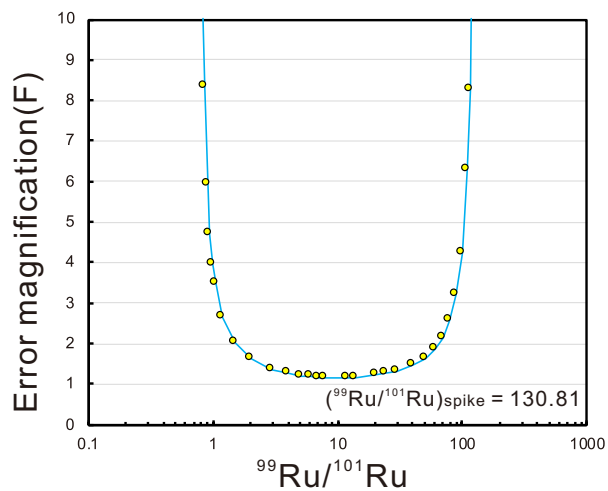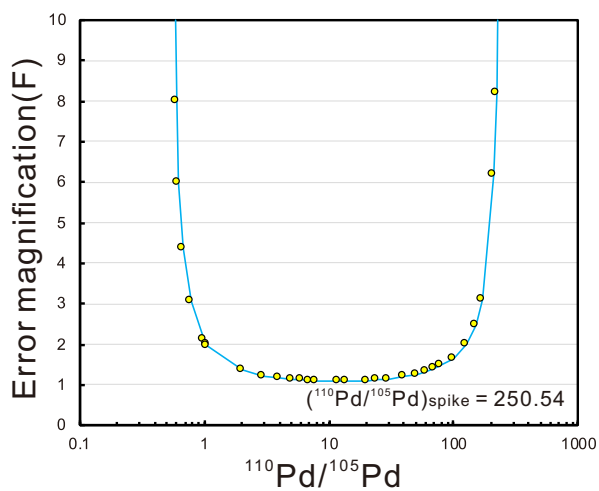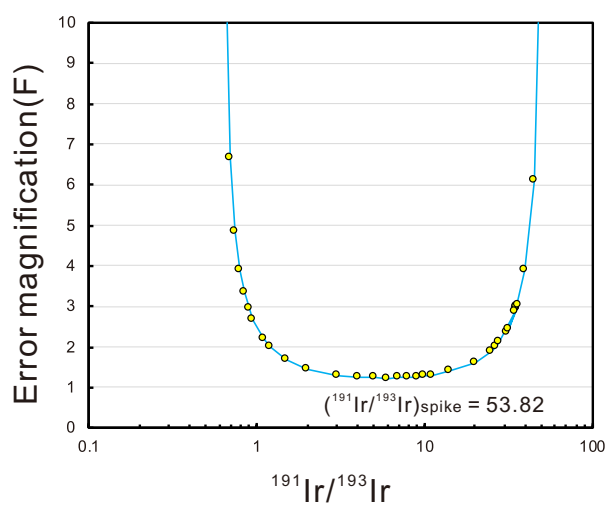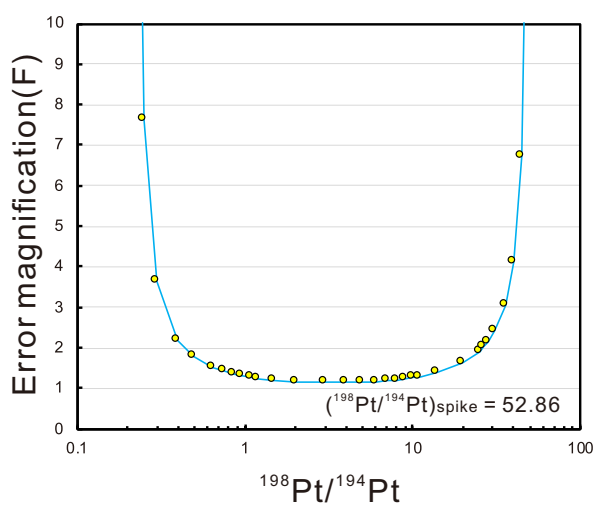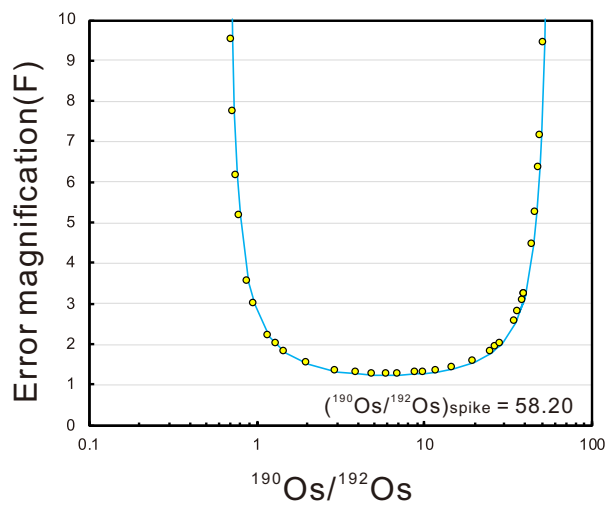

Table S1 Procedural recovery (%) of PGE analytes

| No.  | Ru   | Rh   | Pd   | Os   | Ir   | Pt   |
|------|------|------|------|------|------|------|
| 1    | 85.6 | 67.6 | 69.4 | 95.4 | 38.5 | 67.4 |
| 2    | 81.6 | 58.1 | 62.3 | 88.8 | 47.8 | 57.6 |
| 3    | 85.7 | 53.8 | 55.4 | 94.6 | 37.1 | 53.4 |
| Mean | 84.3 | 59.9 | 62.4 | 92.9 | 41.1 | 59.5 |
| SD   | 2.3  | 7.1  | 7.0  | 3.6  | 5.8  | 7.2  |

Note: The material GPt-1 with addition of PGE standards were fused and prepared. Ru and Os were measured by isotope dilution with the trapping solution of HBr with the spike. Rh-Pd-Ir-Pt were measured with the calibration curve method.

**Table S2 Procedural blanks (ng) of PGE analytes**

|      | Ru    | Rh    | Pd    | Os    | Ir    | Pt    |
|------|-------|-------|-------|-------|-------|-------|
| 1    | 0.056 | 0.011 | 0.335 | 0.042 | 0.013 | 0.146 |
| 2    | 0.046 | 0.015 | 0.485 | 0.038 | 0.017 | 0.129 |
| 3    | 0.072 | 0.014 | 0.205 | 0.035 | 0.025 | 0.172 |
| 4    | 0.07  | 0.016 | 0.216 | 0.053 | 0.011 | 0.157 |
| 5    | 0.028 | 0.007 | 0.314 | 0.032 | 0.017 | 0.105 |
| 6    | 0.061 | 0.005 | 0.246 | 0.028 | 0.023 | 0.16  |
| Mean | 0.056 | 0.011 | 0.3   | 0.038 | 0.018 | 0.145 |
| 3SD  | 0.049 | 0.014 | 0.314 | 0.026 | 0.016 | 0.073 |

**Table S3 Measured isotope ratios, error magnification (F) values, blank correction and relative uncertainties in ratio measurements and PGE contents for reference materials**

| Sample | Ru                            |         |         |                                     |         |                      |
|--------|-------------------------------|---------|---------|-------------------------------------|---------|----------------------|
|        | Content (ng g <sup>-1</sup> ) | dC/C(%) | F value | <sup>99</sup> Ru/ <sup>101</sup> Ru | dR/R(%) | Blank correction (%) |
| GPt-2  | 0.037                         | 137     | 2.28    | 73.2                                | 2.19    | 60.2                 |
|        | 0.045                         | 120     | 2.17    | 70.3                                | 1.84    | 55.3                 |
|        | 0.023                         | 177     | 2.50    | 78.2                                | 3.19    | 70.8                 |
|        | 0.036                         | 194     | 2.59    | 80.2                                | 12.29   | 75.0                 |
|        | 0.056                         | 103     | 2.07    | 67.2                                | 2.10    | 50.0                 |
|        | 0.030                         | 154     | 2.38    | 75.6                                | 2.85    | 64.8                 |
|        | 0.048                         | 86      | 1.60    | 48.0                                | 2.19    | 53.7                 |
|        | 0.027                         | 118     | 1.75    | 55.4                                | 1.85    | 67.4                 |
|        | 0.034                         | 102     | 1.68    | 52.2                                | 7.48    | 60.9                 |
|        | 0.021                         | 128     | 1.77    | 56.5                                | 1.93    | 72.3                 |
| TDB-1  | 0.331                         | 23.2    | 1.59    | 47.9                                | 2.54    | 14.5                 |
|        | 0.255                         | 25.4    | 1.41    | 36.5                                | 1.58    | 18.1                 |
|        | 0.398                         | 14.6    | 1.19    | 15.9                                | 1.46    | 12.3                 |
|        | 0.363                         | 16.0    | 1.19    | 16.9                                | 1.58    | 13.4                 |
|        | 0.396                         | 14.7    | 1.19    | 15.6                                | 1.12    | 12.4                 |
|        | 0.369                         | 16.9    | 1.30    | 28.3                                | 1.40    | 13.0                 |
|        | 0.244                         | 22.8    | 1.24    | 22.2                                | 0.88    | 18.4                 |
|        | 0.258                         | 21.8    | 1.23    | 21.5                                | 1.25    | 17.7                 |
|        | 0.226                         | 24.5    | 1.25    | 22.8                                | 1.27    | 19.7                 |
|        | 0.214                         | 25.6    | 1.25    | 23.5                                | 0.86    | 20.5                 |
| WGB-1  | 0.244                         | 26.6    | 1.42    | 37.3                                | 3.33    | 18.7                 |
|        | 0.252                         | 22.5    | 1.23    | 21.6                                | 1.27    | 18.2                 |
|        | 0.255                         | 25.3    | 1.40    | 36.1                                | 2.10    | 18.0                 |
|        | 0.265                         | 24.3    | 1.39    | 35.2                                | 1.00    | 17.5                 |
|        | 0.260                         | 21.7    | 1.23    | 20.9                                | 2.29    | 17.7                 |
|        | 0.220                         | 25.3    | 1.25    | 23.3                                | 0.41    | 20.3                 |
|        | 0.138                         | 38.8    | 1.34    | 31.5                                | 2.39    | 28.9                 |
|        | 0.137                         | 38.8    | 1.34    | 31.6                                | 0.54    | 28.9                 |
|        | 0.145                         | 36.9    | 1.33    | 30.6                                | 1.16    | 27.8                 |
|        | 0.135                         | 38.8    | 1.33    | 30.9                                | 1.72    | 29.1                 |
| GPt-7  | 0.946                         | 7.0     | 1.26    | 24.1                                | 0.47    | 5.57                 |
|        | 0.986                         | 6.7     | 1.25    | 23.4                                | 0.28    | 5.38                 |
|        | 0.736                         | 8.5     | 1.20    | 17.4                                | 0.88    | 7.08                 |
|        | 0.509                         | 12.3    | 1.25    | 22.9                                | 1.26    | 9.91                 |
|        | 0.513                         | 12.1    | 1.24    | 22.6                                | 1.31    | 9.72                 |
|        | 0.508                         | 11.6    | 1.17    | 12.9                                | 2.37    | 9.94                 |
|        | 0.527                         | 11.3    | 1.17    | 12.6                                | 4.22    | 9.64                 |
|        | 0.564                         | 10.6    | 1.17    | 11.9                                | 1.72    | 9.05                 |
|        | 0.708                         | 8.4     | 1.16    | 9.83                                | 1.00    | 7.20                 |
|        | 0.447                         | 13.2    | 1.18    | 14.7                                | 0.16    | 11.2                 |

|        |      |     |      |      |      |      |
|--------|------|-----|------|------|------|------|
| GPt-4  | 2.13 | 5.9 | 1.19 | 6.08 | 0.55 | 4.96 |
|        | 2.74 | 4.8 | 1.22 | 4.99 | 6.86 | 3.92 |
|        | 2.17 | 3.3 | 1.30 | 3.50 | 2.21 | 2.51 |
|        | 2.82 | 2.7 | 1.37 | 2.89 | 4.06 | 1.95 |
|        | 2.09 | 3.1 | 1.17 | 7.50 | 4.04 | 2.62 |
|        | 2.14 | 3.0 | 1.17 | 7.33 | 2.29 | 2.55 |
|        | 1.87 | 3.6 | 1.23 | 4.53 | 0.19 | 2.89 |
|        | 1.92 | 3.5 | 1.24 | 4.46 | 0.22 | 2.82 |
|        | 1.85 | 3.6 | 1.23 | 4.69 | 1.24 | 2.93 |
|        | 1.73 | 3.8 | 1.22 | 4.96 | 0.71 | 3.13 |
| DZΣ-1  | 11.1 | 0.8 | 1.57 | 2.10 | 1.68 | 0.51 |
|        | 6.38 | 1.2 | 1.35 | 3.07 | 1.13 | 0.87 |
|        | 9.33 | 0.9 | 1.49 | 2.34 | 0.46 | 0.60 |
|        | 8.22 | 1.0 | 1.43 | 2.56 | 0.75 | 0.68 |
|        | 7.07 | 1.1 | 1.37 | 2.88 | 0.52 | 0.79 |
|        | 6.83 | 1.4 | 1.70 | 1.83 | 0.46 | 0.81 |
|        | 8.16 | 1.2 | 1.84 | 1.66 | 0.24 | 0.68 |
|        | 8.41 | 1.2 | 1.85 | 1.64 | 0.78 | 0.66 |
| DZΣ-2  | 5.52 | 1.3 | 1.31 | 3.43 | 0.27 | 1.00 |
|        | 5.73 | 1.3 | 1.32 | 3.30 | 0.56 | 0.97 |
|        | 7.03 | 1.1 | 1.38 | 2.82 | 0.72 | 0.78 |
|        | 5.93 | 1.2 | 1.32 | 3.25 | 0.78 | 0.93 |
|        | 7.53 | 1.0 | 1.40 | 2.74 | 0.72 | 0.74 |
|        | 6.31 | 1.4 | 1.64 | 1.94 | 0.32 | 0.88 |
|        | 6.95 | 1.4 | 1.71 | 1.82 | 0.21 | 0.80 |
| MUH-1  | 4.86 | 1.5 | 1.28 | 3.77 | 0.26 | 1.14 |
|        | 6.66 | 1.1 | 1.36 | 2.98 | 0.32 | 0.84 |
|        | 6.42 | 1.2 | 1.35 | 3.07 | 0.31 | 0.87 |
|        | 8.02 | 1.0 | 1.42 | 2.60 | 0.91 | 0.70 |
|        | 6.22 | 1.2 | 1.34 | 3.13 | 0.64 | 0.90 |
|        | 8.25 | 1.0 | 1.43 | 2.55 | 1.16 | 0.67 |
|        | 4.84 | 1.7 | 1.51 | 2.27 | 0.45 | 1.13 |
|        | 4.75 | 1.7 | 1.51 | 2.26 | 0.13 | 1.14 |
|        | 4.71 | 1.8 | 1.49 | 2.32 | 0.21 | 1.18 |
| Harz01 | 11.1 | 0.8 | 1.57 | 2.10 | 1.59 | 0.50 |
|        | 7.72 | 1.0 | 1.41 | 2.69 | 0.57 | 0.73 |
|        | 7.82 | 1.0 | 1.42 | 2.64 | 0.29 | 0.71 |
|        | 4.44 | 1.6 | 1.26 | 4.03 | 0.85 | 1.24 |
|        | 8.77 | 0.9 | 1.46 | 2.45 | 0.85 | 0.64 |
|        | 9.17 | 0.9 | 1.48 | 2.36 | 0.81 | 0.61 |
|        | 5.34 | 1.3 | 1.30 | 3.54 | 0.43 | 1.04 |
|        | 6.30 | 1.4 | 1.65 | 1.92 | 0.21 | 0.87 |

| Sample | Pd                            |         |         |                                      |         |                      |
|--------|-------------------------------|---------|---------|--------------------------------------|---------|----------------------|
|        | Content (ng g <sup>-1</sup> ) | dC/C(%) | F value | <sup>110</sup> Pd/ <sup>105</sup> Pd | dR/R(%) | Blank correction (%) |
| GPt-2  | 2.69                          | 11.4    | 1.14    | 4.86                                 | 1.88    | 10.0                 |
|        | 2.31                          | 12.9    | 1.13    | 5.49                                 | 2.84    | 11.5                 |
|        | 2.41                          | 12.6    | 1.13    | 5.36                                 | 1.31    | 11.1                 |
|        | 2.50                          | 20.9    | 1.10    | 8.58                                 | 6.27    | 19.0                 |
|        | 2.99                          | 10.5    | 1.15    | 4.47                                 | 2.68    | 9.16                 |
|        | 2.80                          | 11.1    | 1.15    | 4.69                                 | 4.77    | 9.67                 |
|        | 2.79                          | 11.1    | 1.14    | 4.74                                 | 1.39    | 9.70                 |
|        | 2.68                          | 11.6    | 1.15    | 4.51                                 | 1.15    | 10.0                 |
|        | 2.78                          | 10.6    | 1.14    | 5.08                                 | 2.01    | 9.33                 |
|        | 2.91                          | 10.6    | 1.14    | 4.70                                 | 1.88    | 9.24                 |
| TDB-1  | 24.3                          | 2.44    | 1.99    | 1.06                                 | 1.08    | 1.23                 |
|        | 30.9                          | 2.16    | 2.24    | 0.95                                 | 1.20    | 0.97                 |
|        | 28.3                          | 2.24    | 2.13    | 0.99                                 | 1.75    | 1.05                 |
|        | 22.3                          | 2.57    | 1.93    | 1.09                                 | 2.07    | 1.33                 |
|        | 20.0                          | 2.72    | 1.84    | 1.15                                 | 1.45    | 1.48                 |
|        | 23.4                          | 2.49    | 1.99    | 1.06                                 | 2.06    | 1.25                 |
|        | 22.5                          | 2.39    | 1.85    | 1.15                                 | 0.79    | 1.29                 |
|        | 24.9                          | 2.40    | 2.03    | 1.04                                 | 1.09    | 1.18                 |
|        | 36.8                          | 1.94    | 2.42    | 0.89                                 | 0.90    | 0.80                 |
|        | 34.2                          | 2.00    | 2.34    | 0.92                                 | 0.73    | 0.85                 |
| WGB-1  | 14.7                          | 3.22    | 1.60    | 1.40                                 | 1.71    | 2.00                 |
|        | 23.5                          | 2.50    | 1.97    | 1.07                                 | 1.91    | 1.26                 |
|        | 9.67                          | 4.27    | 1.42    | 1.80                                 | 1.56    | 3.01                 |
|        | 11.5                          | 3.81    | 1.49    | 1.61                                 | 0.45    | 2.55                 |
|        | 13.3                          | 3.44    | 1.57    | 1.46                                 | 1.61    | 2.20                 |
|        | 11.8                          | 3.72    | 1.51    | 1.57                                 | 1.14    | 2.47                 |
|        | 12.2                          | 3.69    | 1.54    | 1.51                                 | 1.18    | 2.39                 |
|        | 10.2                          | 4.09    | 1.45    | 1.72                                 | 2.36    | 2.83                 |
|        | 11.0                          | 3.84    | 1.46    | 1.68                                 | 0.40    | 2.63                 |
|        | 11.0                          | 3.79    | 1.44    | 1.73                                 | 0.39    | 2.63                 |
| GPt-7  | 22.2                          | 2.54    | 1.92    | 1.10                                 | 1.45    | 1.33                 |
|        | 23.2                          | 2.49    | 1.95    | 1.08                                 | 0.59    | 1.28                 |
|        | 25.3                          | 2.37    | 2.02    | 1.04                                 | 0.80    | 1.17                 |
|        | 21.9                          | 2.55    | 1.89    | 1.12                                 | 1.21    | 1.35                 |
|        | 25.2                          | 2.34    | 2.02    | 1.04                                 | 2.79    | 1.16                 |
|        | 17.6                          | 2.91    | 1.74    | 1.24                                 | 0.96    | 1.67                 |
|        | 24.1                          | 2.52    | 2.04    | 1.03                                 | 0.83    | 1.24                 |
|        | 21.6                          | 2.61    | 1.90    | 1.11                                 | 1.84    | 1.37                 |
|        | 18.9                          | 2.77    | 1.81    | 1.18                                 | 0.42    | 1.54                 |
|        | 24.0                          | 2.53    | 2.04    | 1.03                                 | 1.03    | 1.24                 |

|                |       |      |      |      |      |      |
|----------------|-------|------|------|------|------|------|
| GPt-4          | 62.8  | 2.15 | 2.29 | 0.93 | 1.03 | 0.94 |
|                | 93.0  | 1.85 | 2.89 | 0.80 | 0.34 | 0.64 |
|                | 91.3  | 1.50 | 4.6  | 0.67 | 0.66 | 0.33 |
|                | 69.8  | 1.60 | 3.7  | 0.72 | 0.46 | 0.43 |
|                | 71.2  | 1.61 | 3.8  | 0.71 | 1.53 | 0.42 |
|                | 116   | 1.44 | 5.6  | 0.64 | 0.96 | 0.26 |
|                | 63.1  | 1.70 | 3.6  | 0.73 | 0.75 | 0.47 |
|                | 57.5  | 1.75 | 3.4  | 0.75 | 1.82 | 0.52 |
|                | 71.8  | 1.49 | 3.6  | 0.73 | 0.22 | 0.41 |
|                | 68.6  | 1.68 | 3.9  | 0.71 | 0.61 | 0.43 |
| DZ $\Sigma$ -1 | 6.23  | 5.86 | 1.27 | 2.54 | 0.74 | 4.61 |
|                | 4.51  | 7.51 | 1.20 | 3.27 | 4.18 | 6.24 |
|                | 4.36  | 7.72 | 1.20 | 3.35 | 3.75 | 6.44 |
|                | 4.93  | 7.01 | 1.22 | 3.06 | 3.66 | 5.75 |
|                | 4.98  | 7.00 | 1.22 | 3.04 | 1.66 | 5.73 |
|                | 4.32  | 7.80 | 1.21 | 3.26 | 2.33 | 6.47 |
|                | 4.32  | 7.81 | 1.21 | 3.25 | 2.07 | 6.48 |
|                | 5.52  | 6.47 | 1.25 | 2.72 | 0.63 | 5.17 |
| DZ $\Sigma$ -2 | 1.28  | 20.9 | 1.10 | 8.64 | 3.36 | 19.0 |
|                | 1.06  | 24.2 | 1.10 | 9.91 | 7.53 | 22.0 |
|                | 1.07  | 23.8 | 1.10 | 9.77 | 2.94 | 21.7 |
|                | 1.67  | 16.9 | 1.11 | 7.04 | 3.57 | 15.2 |
|                | 1.45  | 19.0 | 1.10 | 7.92 | 2.74 | 17.2 |
|                | 1.37  | 19.8 | 1.10 | 7.97 | 1.46 | 17.9 |
|                | 1.55  | 18.0 | 1.11 | 7.35 | 3.27 | 16.2 |
|                | MUH-1 | 12.8 | 3.49 | 1.53 | 1.54 | 1.39 |
| 14.2           |       | 3.28 | 1.58 | 1.44 | 1.60 | 2.08 |
| 19.4           |       | 2.73 | 1.78 | 1.20 | 2.26 | 1.53 |
| 9.20           |       | 4.38 | 1.38 | 1.92 | 3.94 | 3.17 |
| 8.32           |       | 4.76 | 1.36 | 2.02 | 3.29 | 3.50 |
| 12.4           |       | 3.56 | 1.51 | 1.56 | 1.81 | 2.35 |
| 10.6           |       | 3.96 | 1.46 | 1.68 | 1.17 | 2.71 |
| 12.5           |       | 3.54 | 1.55 | 1.50 | 1.57 | 2.29 |
| 9.88           |       | 4.22 | 1.43 | 1.78 | 1.72 | 2.96 |
| Harz01         |       | 8.31 | 4.72 | 1.35 | 2.06 | 0.52 |
|                | 6.56  | 5.64 | 1.28 | 2.46 | 1.24 | 4.40 |
|                | 6.44  | 5.73 | 1.29 | 2.40 | 0.90 | 4.44 |
|                | 7.27  | 5.18 | 1.31 | 2.27 | 1.97 | 3.95 |
|                | 7.89  | 4.90 | 1.33 | 2.15 | 2.05 | 3.67 |
|                | 7.94  | 4.87 | 1.34 | 2.11 | 2.86 | 3.64 |
|                | 5.60  | 6.35 | 1.25 | 2.77 | 2.64 | 5.10 |
|                | 4.97  | 6.95 | 1.23 | 2.91 | 1.03 | 5.64 |



| Sample | Os                            |         |         |                                      |         |                      |
|--------|-------------------------------|---------|---------|--------------------------------------|---------|----------------------|
|        | Content (ng g <sup>-1</sup> ) | dC/C(%) | F value | <sup>190</sup> Os/ <sup>192</sup> Os | dR/R(%) | Blank correction (%) |
| GPt-2  | 0.063                         | 50.0    | 1.33    | 12.54                                | 0.50    | 37.6                 |
|        | 0.033                         | 78.1    | 1.46    | 17.17                                | 0.09    | 53.6                 |
|        | 0.062                         | 50.6    | 1.33    | 12.66                                | 1.52    | 38.0                 |
|        | 0.014                         | 149     | 1.78    | 25.06                                | 2.96    | 83.6                 |
|        | 0.074                         | 44.2    | 1.30    | 11.44                                | 0.83    | 33.9                 |
|        | 0.041                         | 67.8    | 1.41    | 15.60                                | 0.43    | 48.1                 |
|        | 0.087                         | 37.5    | 1.24    | 5.72                                 | 0.10    | 30.3                 |
|        | 0.108                         | 32.4    | 1.24    | 5.08                                 | 1.48    | 26.1                 |
|        | 0.134                         | 26.8    | 1.26    | 4.29                                 | 0.50    | 21.4                 |
|        | 0.026                         | 75.2    | 1.28    | 10.02                                | 0.95    | 58.9                 |
| TDB-1  | 0.492                         | 8.95    | 1.24    | 4.99                                 | 0.31    | 7.21                 |
|        | 0.231                         | 17.6    | 1.24    | 5.22                                 | 0.74    | 14.2                 |
|        | 0.238                         | 18.3    | 1.33    | 3.00                                 | 0.33    | 13.8                 |
|        | 0.228                         | 18.9    | 1.32    | 3.06                                 | 0.16    | 14.3                 |
|        | 0.262                         | 17.2    | 1.35    | 2.77                                 | 0.65    | 12.7                 |
|        | 0.220                         | 19.3    | 1.33    | 2.98                                 | 0.47    | 14.5                 |
|        | 0.220                         | 19.1    | 1.32    | 3.13                                 | 0.76    | 14.5                 |
|        | 0.120                         | 29.8    | 1.25    | 4.71                                 | 1.44    | 23.9                 |
|        | 0.331                         | 14.5    | 1.42    | 2.35                                 | 1.46    | 10.2                 |
|        | 0.305                         | 15.3    | 1.40    | 2.46                                 | 0.90    | 10.9                 |
| WGB-1  | 0.705                         | 7.33    | 1.43    | 2.32                                 | 0.47    | 5.14                 |
|        | 0.532                         | 10.73   | 1.60    | 1.77                                 | 0.84    | 6.70                 |
|        | 0.687                         | 9.37    | 1.79    | 1.49                                 | 0.64    | 5.24                 |
|        | 0.570                         | 10.44   | 1.67    | 1.65                                 | 0.56    | 6.26                 |
|        | 0.849                         | 8.23    | 1.92    | 1.36                                 | 0.28    | 4.28                 |
|        | 0.760                         | 8.74    | 1.84    | 1.44                                 | 1.23    | 4.76                 |
|        | 0.805                         | 8.34    | 1.85    | 1.42                                 | 0.20    | 4.50                 |
|        | 0.533                         | 10.55   | 1.59    | 1.79                                 | 0.63    | 6.62                 |
|        | 0.625                         | 9.59    | 1.68    | 1.63                                 | 0.46    | 5.71                 |
|        | 0.567                         | 10.27   | 1.65    | 1.69                                 | 0.45    | 6.24                 |
| GPt-7  | 0.990                         | 4.93    | 1.34    | 2.89                                 | 0.57    | 3.68                 |
|        | 1.157                         | 4.38    | 1.38    | 2.59                                 | 1.18    | 3.18                 |
|        | 0.832                         | 6.51    | 1.49    | 2.07                                 | 1.12    | 4.37                 |
|        | 0.636                         | 7.88    | 1.40    | 2.47                                 | 0.65    | 5.64                 |
|        | 0.636                         | 7.79    | 1.40    | 2.45                                 | 1.04    | 5.56                 |
|        | 0.622                         | 9.76    | 1.69    | 1.61                                 | 0.54    | 5.76                 |
|        | 0.640                         | 9.63    | 1.71    | 1.58                                 | 0.38    | 5.62                 |
|        | 0.665                         | 9.40    | 1.74    | 1.55                                 | 0.87    | 5.42                 |
|        | 0.749                         | 8.69    | 1.83    | 1.44                                 | 0.92    | 4.74                 |
|        | 0.593                         | 9.94    | 1.65    | 1.69                                 | 0.22    | 6.04                 |

|                |      |      |      |      |      |      |
|----------------|------|------|------|------|------|------|
| GPt-4          | 2.80 | 4.95 | 1.88 | 1.39 | 1.12 | 2.63 |
|                | 3.26 | 4.58 | 2.02 | 1.29 | 0.14 | 2.27 |
|                | 2.61 | 3.71 | 2.59 | 1.05 | 1.10 | 1.43 |
|                | 3.10 | 3.48 | 2.88 | 0.99 | 0.60 | 1.21 |
|                | 2.47 | 3.46 | 2.27 | 1.16 | 0.84 | 1.52 |
|                | 2.47 | 3.45 | 2.27 | 1.16 | 1.35 | 1.52 |
|                | 2.49 | 5.36 | 3.6  | 0.89 | 0.41 | 1.50 |
|                | 2.46 | 5.37 | 3.5  | 0.90 | 0.19 | 1.52 |
|                | 2.20 | 5.44 | 3.2  | 0.94 | 0.40 | 1.69 |
|                | 2.15 | 5.47 | 3.2  | 0.94 | 0.60 | 1.73 |
| DZ $\Sigma$ -1 | 6.68 | 2.54 | 4.5  | 0.83 | 0.29 | 0.57 |
|                | 5.29 | 2.68 | 3.8  | 0.88 | 0.80 | 0.71 |
|                | 6.67 | 2.52 | 4.5  | 0.83 | 0.71 | 0.57 |
|                | 5.55 | 2.63 | 3.9  | 0.87 | 0.65 | 0.68 |
|                | 4.69 | 2.72 | 3.3  | 0.92 | 0.15 | 0.81 |
|                | 4.10 | 4.77 | 5.2  | 0.80 | 0.07 | 0.92 |
|                | 5.21 | 4.57 | 6.3  | 0.76 | 0.14 | 0.72 |
|                | 5.51 | 4.52 | 6.6  | 0.76 | 0.48 | 0.69 |
| DZ $\Sigma$ -2 | 4.28 | 2.84 | 3.2  | 0.94 | 0.79 | 0.88 |
|                | 4.54 | 2.80 | 3.4  | 0.92 | 1.24 | 0.83 |
|                | 7.39 | 2.46 | 4.9  | 0.81 | 0.65 | 0.50 |
|                | 3.61 | 2.95 | 2.84 | 1.00 | 1.42 | 1.04 |
|                | 6.94 | 2.46 | 4.5  | 0.83 | 0.18 | 0.55 |
|                | 4.36 | 4.66 | 5.4  | 0.79 | 0.32 | 0.86 |
|                | 6.42 | 4.43 | 7.5  | 0.74 | 0.20 | 0.59 |
| MUH-1          | 3.69 | 2.99 | 2.94 | 0.98 | 0.43 | 1.02 |
|                | 4.38 | 2.84 | 3.3  | 0.93 | 0.92 | 0.87 |
|                | 4.41 | 2.83 | 3.3  | 0.93 | 0.11 | 0.86 |
|                | 5.17 | 2.69 | 3.7  | 0.89 | 0.81 | 0.73 |
|                | 4.32 | 2.83 | 3.2  | 0.94 | 0.26 | 0.88 |
|                | 4.40 | 2.76 | 3.2  | 0.93 | 0.28 | 0.85 |
|                | 3.48 | 4.88 | 4.6  | 0.82 | 0.20 | 1.07 |
|                | 3.69 | 4.85 | 4.9  | 0.81 | 0.24 | 1.00 |
|                | 3.72 | 4.86 | 4.8  | 0.81 | 0.50 | 1.02 |
| Harz01         | 8.71 | 2.40 | 5.5  | 0.79 | 0.51 | 0.44 |
|                | 6.78 | 2.53 | 4.5  | 0.83 | 0.26 | 0.56 |
|                | 4.85 | 2.75 | 3.5  | 0.90 | 0.33 | 0.78 |
|                | 3.64 | 2.99 | 2.91 | 0.98 | 0.69 | 1.03 |
|                | 6.06 | 2.58 | 4.1  | 0.85 | 1.09 | 0.62 |
|                | 6.17 | 2.54 | 4.1  | 0.85 | 0.81 | 0.61 |
|                | 4.41 | 2.76 | 3.2  | 0.94 | 1.06 | 0.86 |
|                | 4.87 | 4.60 | 6.0  | 0.77 | 0.81 | 0.77 |

| Sample | Ir                            |         |         |                                      |         |                      |
|--------|-------------------------------|---------|---------|--------------------------------------|---------|----------------------|
|        | Content (ng g <sup>-1</sup> ) | dC/C(%) | F value | <sup>191</sup> Ir/ <sup>193</sup> Ir | dR/R(%) | Blank correction (%) |
| GPt-2  | 0.046                         | 54.6    | 1.94    | 25.8                                 | 11.0    | 28.1                 |
|        | 0.022                         | 113     | 2.50    | 32.1                                 | 12.1    | 45.3                 |
|        | 0.031                         | 83.1    | 2.24    | 29.6                                 | 6.98    | 37.1                 |
|        | 0.028                         | 158     | 2.82    | 34.7                                 | 1.67    | 55.8                 |
|        | 0.044                         | 57.8    | 1.97    | 26.2                                 | 12.0    | 29.3                 |
|        | 0.040                         | 63.6    | 2.04    | 27.1                                 | 15.0    | 31.2                 |
|        | 0.496                         | 4.32    | 1.24    | 5.96                                 | 4.26    | 3.50                 |
|        | 0.147                         | 15.0    | 1.38    | 13.5                                 | 2.79    | 10.9                 |
|        | 0.107                         | 21.4    | 1.55    | 18.3                                 | 11.0    | 13.8                 |
|        | 0.048                         | 52.5    | 1.94    | 25.8                                 | 23.7    | 27.0                 |
| TDB-1  | 0.273                         | 7.95    | 1.28    | 9.32                                 | 1.39    | 6.22                 |
|        | 0.114                         | 20.4    | 1.49    | 16.8                                 | 4.25    | 13.7                 |
|        | 0.130                         | 17.6    | 1.45    | 15.6                                 | 15.5    | 12.2                 |
|        | 0.154                         | 14.5    | 1.39    | 13.7                                 | 6.87    | 10.5                 |
|        | 0.103                         | 22.5    | 1.51    | 17.4                                 | 21.2    | 14.9                 |
|        | 0.100                         | 22.9    | 1.52    | 17.5                                 | 14.8    | 15.1                 |
|        | 0.098                         | 24.1    | 1.58    | 19.1                                 | 16.0    | 15.2                 |
|        | 0.089                         | 26.2    | 1.57    | 18.9                                 | 12.2    | 16.7                 |
|        | 0.104                         | 22.4    | 1.54    | 18.1                                 | 21.4    | 14.6                 |
|        | 0.122                         | 18.7    | 1.48    | 16.4                                 | 20.7    | 12.7                 |
| WGB-1  | 0.311                         | 6.93    | 1.26    | 8.51                                 | 4.35    | 5.49                 |
|        | 0.107                         | 21.6    | 1.50    | 17.1                                 | 4.31    | 14.4                 |
|        | 0.193                         | 11.3    | 1.33    | 11.7                                 | 14.1    | 8.52                 |
|        | 0.258                         | 8.36    | 1.28    | 9.52                                 | 2.86    | 6.52                 |
|        | 0.209                         | 10.4    | 1.32    | 11.1                                 | 11.8    | 7.92                 |
|        | 0.267                         | 8.07    | 1.28    | 9.30                                 | 4.76    | 6.32                 |
|        | 0.279                         | 7.68    | 1.27    | 8.75                                 | 12.4    | 6.06                 |
|        | 0.229                         | 9.40    | 1.30    | 10.3                                 | 1.26    | 7.25                 |
|        | 0.234                         | 9.24    | 1.30    | 10.5                                 | 4.34    | 7.10                 |
|        | 0.339                         | 6.30    | 1.26    | 8.23                                 | 14.57   | 5.00                 |
| GPt-7  | 2.151                         | 1.22    | 1.48    | 1.95                                 | 1.45    | 0.83                 |
|        | 2.194                         | 1.21    | 1.48    | 1.93                                 | 0.86    | 0.81                 |
|        | 2.004                         | 1.29    | 1.44    | 2.07                                 | 2.14    | 0.89                 |
|        | 2.165                         | 1.21    | 1.47    | 1.96                                 | 2.46    | 0.82                 |
|        | 2.140                         | 1.21    | 1.47    | 1.98                                 | 1.07    | 0.82                 |
|        | 1.935                         | 1.33    | 1.44    | 2.07                                 | 3.02    | 0.92                 |
|        | 2.141                         | 1.25    | 1.50    | 1.89                                 | 3.61    | 0.84                 |
|        | 2.046                         | 1.28    | 1.46    | 2.00                                 | 4.40    | 0.87                 |
|        | 2.364                         | 1.14    | 1.53    | 1.79                                 | 5.44    | 0.74                 |
|        | 2.042                         | 1.30    | 1.48    | 1.95                                 | 2.94    | 0.88                 |

|                |       |      |      |      |      |      |
|----------------|-------|------|------|------|------|------|
| GPt-4          | 7.484 | 0.85 | 1.78 | 1.38 | 0.99 | 0.48 |
|                | 9.419 | 0.75 | 1.97 | 1.22 | 1.01 | 0.38 |
|                | 9.298 | 0.54 | 2.82 | 0.93 | 1.98 | 0.19 |
|                | 8.853 | 0.55 | 2.73 | 0.94 | 2.49 | 0.20 |
|                | 7.587 | 0.59 | 2.50 | 1.00 | 0.91 | 0.24 |
|                | 7.385 | 0.60 | 2.45 | 1.01 | 2.98 | 0.24 |
|                | 7.522 | 0.61 | 2.55 | 0.98 | 2.98 | 0.24 |
|                | 7.630 | 0.60 | 2.57 | 0.98 | 4.42 | 0.23 |
|                | 8.875 | 0.52 | 2.59 | 0.97 | 1.90 | 0.20 |
|                | 9.868 | 0.55 | 3.05 | 0.89 | 1.64 | 0.18 |
| DZ $\Sigma$ -1 | 2.100 | 1.25 | 1.46 | 2.01 | 3.62 | 0.85 |
|                | 2.062 | 1.26 | 1.45 | 2.04 | 7.96 | 0.87 |
|                | 2.462 | 1.11 | 1.53 | 1.81 | 1.65 | 0.73 |
|                | 2.729 | 1.03 | 1.57 | 1.70 | 4.04 | 0.66 |
|                | 2.066 | 1.26 | 1.45 | 2.05 | 3.44 | 0.87 |
|                | 1.970 | 1.31 | 1.45 | 2.04 | 2.53 | 0.90 |
|                | 2.327 | 1.16 | 1.52 | 1.82 | 0.77 | 0.77 |
|                | 2.624 | 1.07 | 1.57 | 1.70 | 2.74 | 0.68 |
| DZ $\Sigma$ -2 | 3.033 | 0.96 | 1.63 | 1.58 | 2.03 | 0.59 |
|                | 2.967 | 0.98 | 1.62 | 1.61 | 3.44 | 0.60 |
|                | 2.100 | 1.23 | 1.46 | 1.99 | 3.24 | 0.84 |
|                | 3.907 | 0.83 | 1.80 | 1.36 | 0.46 | 0.46 |
|                | 6.606 | 0.63 | 2.30 | 1.06 | 1.16 | 0.27 |
|                | 2.616 | 1.07 | 1.57 | 1.70 | 3.99 | 0.68 |
|                | 3.645 | 0.87 | 1.77 | 1.40 | 5.45 | 0.49 |
| MUH-1          | 3.655 | 0.86 | 1.75 | 1.42 | 2.05 | 0.49 |
|                | 3.528 | 0.88 | 1.72 | 1.45 | 1.80 | 0.51 |
|                | 2.952 | 0.98 | 1.61 | 1.62 | 2.90 | 0.61 |
|                | 3.612 | 0.86 | 1.74 | 1.43 | 1.69 | 0.50 |
|                | 3.874 | 0.84 | 1.81 | 1.36 | 1.39 | 0.47 |
|                | 4.595 | 0.75 | 1.93 | 1.25 | 3.60 | 0.39 |
|                | 3.027 | 0.97 | 1.66 | 1.54 | 1.40 | 0.58 |
|                | 2.955 | 0.98 | 1.65 | 1.55 | 0.88 | 0.59 |
|                | 2.661 | 1.07 | 1.58 | 1.68 | 1.75 | 0.67 |
| Harz01         | 5.276 | 0.70 | 2.06 | 1.17 | 1.58 | 0.34 |
|                | 3.660 | 0.86 | 1.75 | 1.42 | 2.48 | 0.49 |
|                | 4.242 | 0.80 | 1.89 | 1.28 | 2.37 | 0.42 |
|                | 3.829 | 0.83 | 1.78 | 1.38 | 2.79 | 0.47 |
|                | 5.003 | 0.72 | 2.00 | 1.20 | 3.23 | 0.36 |
|                | 4.457 | 0.77 | 1.91 | 1.27 | 3.54 | 0.40 |
|                | 3.932 | 0.82 | 1.80 | 1.37 | 2.64 | 0.46 |
|                | 5.457 | 0.70 | 2.14 | 1.13 | 1.03 | 0.33 |

| Sample | Pt                            |         |         |                                      |         |                      |
|--------|-------------------------------|---------|---------|--------------------------------------|---------|----------------------|
|        | Content (ng g <sup>-1</sup> ) | dC/C(%) | F value | <sup>198</sup> Pt/ <sup>194</sup> Pt | dR/R(%) | Blank correction (%) |
| GPt-2  | 1.96                          | 8.00    | 1.16    | 5.78                                 | 0.90    | 6.88                 |
|        | 1.81                          | 8.67    | 1.17    | 6.18                                 | 0.66    | 7.41                 |
|        | 1.91                          | 8.25    | 1.16    | 5.96                                 | 3.07    | 7.08                 |
|        | 2.05                          | 15.0    | 1.24    | 9.28                                 | 2.82    | 12.1                 |
|        | 1.99                          | 7.91    | 1.16    | 5.70                                 | 1.85    | 6.82                 |
|        | 1.97                          | 7.95    | 1.16    | 5.73                                 | 2.72    | 6.85                 |
|        | 2.04                          | 7.70    | 1.16    | 5.62                                 | 1.90    | 6.64                 |
|        | 1.94                          | 8.02    | 1.16    | 5.40                                 | 1.96    | 6.94                 |
|        | 2.07                          | 7.31    | 1.16    | 5.93                                 | 2.09    | 6.28                 |
|        | 1.92                          | 8.11    | 1.17    | 6.05                                 | 4.97    | 6.95                 |
| TDB-1  | 5.44                          | 2.99    | 1.15    | 2.45                                 | 2.18    | 2.61                 |
|        | 5.38                          | 3.01    | 1.14    | 2.50                                 | 1.53    | 2.63                 |
|        | 6.21                          | 2.63    | 1.15    | 2.22                                 | 2.00    | 2.28                 |
|        | 5.24                          | 3.09    | 1.15    | 2.49                                 | 3.94    | 2.70                 |
|        | 5.02                          | 3.21    | 1.14    | 2.56                                 | 2.01    | 2.81                 |
|        | 5.32                          | 3.00    | 1.15    | 2.41                                 | 3.77    | 2.61                 |
|        | 4.66                          | 3.37    | 1.14    | 3.01                                 | 2.10    | 2.96                 |
|        | 4.35                          | 3.64    | 1.14    | 2.92                                 | 1.65    | 3.19                 |
|        | 5.53                          | 2.89    | 1.14    | 2.52                                 | 0.91    | 2.53                 |
|        | 4.76                          | 3.31    | 1.14    | 2.83                                 | 2.51    | 2.91                 |
| WGB-1  | 3.55                          | 4.48    | 1.14    | 3.54                                 | 0.27    | 3.94                 |
|        | 30.2                          | 0.73    | 1.53    | 0.64                                 | 3.42    | 0.48                 |
|        | 4.63                          | 3.46    | 1.14    | 2.75                                 | 1.76    | 3.04                 |
|        | 8.59                          | 1.97    | 1.19    | 1.63                                 | 2.74    | 1.66                 |
|        | 3.77                          | 4.21    | 1.14    | 3.28                                 | 4.65    | 3.70                 |
|        | 3.79                          | 4.18    | 1.14    | 3.26                                 | 1.46    | 3.68                 |
|        | 5.60                          | 2.90    | 1.15    | 2.27                                 | 2.15    | 2.52                 |
|        | 3.47                          | 4.53    | 1.14    | 3.48                                 | 2.60    | 3.99                 |
|        | 7.40                          | 2.23    | 1.17    | 1.90                                 | 2.77    | 1.91                 |
|        | 3.35                          | 4.69    | 1.14    | 3.85                                 | 0.94    | 4.12                 |
| GPt-7  | 12.6                          | 1.40    | 1.24    | 1.21                                 | 0.76    | 1.13                 |
|        | 13.6                          | 1.33    | 1.26    | 1.14                                 | 0.77    | 1.06                 |
|        | 13.9                          | 1.30    | 1.26    | 1.14                                 | 1.24    | 1.03                 |
|        | 16.6                          | 1.12    | 1.30    | 0.99                                 | 1.09    | 0.86                 |
|        | 12.5                          | 1.40    | 1.24    | 1.23                                 | 1.12    | 1.13                 |
|        | 13.5                          | 1.34    | 1.26    | 1.14                                 | 1.40    | 1.06                 |
|        | 15.1                          | 1.23    | 1.29    | 1.01                                 | 1.65    | 0.95                 |
|        | 13.1                          | 1.38    | 1.25    | 1.17                                 | 2.74    | 1.10                 |
|        | 13.0                          | 1.36    | 1.26    | 1.15                                 | 1.48    | 1.08                 |
|        | 12.4                          | 1.45    | 1.25    | 1.17                                 | 2.38    | 1.16                 |

|                |      |      |      |      |      |      |
|----------------|------|------|------|------|------|------|
| GPt-4          | 45.1 | 0.89 | 1.40 | 0.78 | 0.46 | 0.64 |
|                | 1992 | 0.26 | 18   | 0.23 | 0.23 | 0.01 |
|                | 79.8 | 0.42 | 2.31 | 0.38 | 0.60 | 0.18 |
|                | 282  | 0.29 | 5.6  | 0.26 | 0.29 | 0.05 |
|                | 87.2 | 0.41 | 2.45 | 0.37 | 0.92 | 0.17 |
|                | 58.6 | 0.49 | 1.98 | 0.44 | 0.58 | 0.25 |
|                | 58.2 | 0.50 | 2.01 | 0.43 | 1.57 | 0.25 |
|                | 57.5 | 0.50 | 2.00 | 0.44 | 0.81 | 0.25 |
|                | 56.9 | 0.47 | 1.87 | 0.47 | 1.95 | 0.25 |
|                | 61.7 | 0.49 | 2.09 | 0.42 | 0.69 | 0.23 |
| DZ $\Sigma$ -1 | 2.21 | 7.12 | 1.15 | 5.26 | 0.23 | 6.17 |
|                | 1.75 | 8.98 | 1.17 | 6.39 | 1.90 | 7.65 |
|                | 1.74 | 9.00 | 1.17 | 6.39 | 3.87 | 7.68 |
|                | 2.83 | 5.59 | 1.14 | 4.34 | 3.46 | 4.90 |
|                | 1.79 | 8.85 | 1.17 | 6.30 | 3.22 | 7.56 |
|                | 3.36 | 4.69 | 1.14 | 3.60 | 3.18 | 4.12 |
|                | 4.81 | 3.33 | 1.14 | 2.65 | 0.78 | 2.92 |
|                | 2.82 | 5.60 | 1.14 | 4.21 | 5.66 | 4.91 |
| DZ $\Sigma$ -2 | 2.98 | 5.29 | 1.14 | 4.11 | 0.51 | 4.64 |
|                | 2.71 | 5.81 | 1.14 | 4.47 | 6.32 | 5.08 |
|                | 4.18 | 3.76 | 1.14 | 3.07 | 2.03 | 3.31 |
|                | 6.04 | 2.70 | 1.15 | 2.25 | 1.51 | 2.34 |
|                | 9.66 | 1.78 | 1.19 | 1.54 | 1.94 | 1.49 |
|                | 5.82 | 2.79 | 1.15 | 2.27 | 2.15 | 2.43 |
|                | 10.7 | 1.62 | 1.21 | 1.38 | 2.33 | 1.34 |
| MUH-1          | 8.40 | 1.99 | 1.18 | 1.71 | 0.74 | 1.69 |
|                | 8.40 | 2.01 | 1.18 | 1.73 | 1.26 | 1.71 |
|                | 6.51 | 2.53 | 1.16 | 2.13 | 0.43 | 2.19 |
|                | 6.38 | 2.57 | 1.15 | 2.17 | 2.82 | 2.23 |
|                | 7.80 | 2.15 | 1.17 | 1.79 | 0.84 | 1.84 |
|                | 10.3 | 1.67 | 1.21 | 1.44 | 1.03 | 1.39 |
|                | 8.16 | 2.04 | 1.18 | 1.69 | 1.03 | 1.72 |
|                | 8.06 | 2.04 | 1.18 | 1.69 | 3.29 | 1.73 |
|                | 8.70 | 1.95 | 1.19 | 1.62 | 3.35 | 1.65 |
| Harz01         | 10.4 | 1.66 | 1.21 | 1.44 | 1.01 | 1.38 |
|                | 5.98 | 2.74 | 1.15 | 2.30 | 1.85 | 2.38 |
|                | 7.86 | 2.13 | 1.18 | 1.75 | 2.38 | 1.81 |
|                | 8.68 | 1.94 | 1.18 | 1.67 | 1.79 | 1.64 |
|                | 12.7 | 1.40 | 1.24 | 1.23 | 2.39 | 1.13 |
|                | 12.4 | 1.43 | 1.24 | 1.24 | 0.57 | 1.15 |
|                | 5.74 | 2.84 | 1.15 | 2.38 | 1.06 | 2.47 |
|                | 6.98 | 2.35 | 1.16 | 1.93 | 0.81 | 2.01 |

### 3.3 Determination of Rh

Following the standard calibration method, the calculation equation for Rh concentration  $(C_{Rh})_s$  in resulting solutions is:

$$(C_{Rh})_s = \left( \frac{C_{Rh}}{C_{IS}} \times \frac{I_{IS}}{I_{Rh}} \right)_{std} \times \left( C_{IS} \times \frac{I_{Rh}}{I_{IS}} \right)_s \quad (1)$$

where the subscript Rh, s, std, and IS standard for Rh, resulting solution, standard and internal standard, respectively.

When  $^{198}\text{Pt}$  was selected as internal standard for analysis of Rh, the concentration of  $^{198}\text{Pt}$   $(C_{198})_s$  is equal to the following:

$$(C_{198})_s = \left( \frac{\Sigma M_{198}}{V} \right)_s \quad (2)$$

where V is the volume of the resulting solution,  $(\Sigma M_{198})_s$  is the total mass of  $^{198}\text{Pt}$ , which actually consists of two parts from the sample and the  $^{198}\text{Pt}$  spike. Since the added quantity of the  $^{198}\text{Pt}$  spike is known and the content of Pt in the sample can be determined by isotope dilution, the mass of  $^{198}\text{Pt}$   $(\Sigma M_{198})_s$  can be computed by the followed equation:

$$(\Sigma M_{198})_s = (0.9176 \times M)_{spi} + (0.0716 \times M)_s \quad (3)$$

where the constants of 0.9176 and 0.0716 are the relative abundances of  $^{198}\text{Pt}$  in the spike and in nature, respectively; M is the mass of Pt in the spike and in the sample.

By combining Equ. 1, 2 and 3, the content of Rh (C) in the sample (W) can be derived as follows:

$$C = \frac{V \times (C_{Rh})_s}{W} = \left( \frac{C_{Rh}}{C_{198}} \times \frac{I_{198}}{I_{Rh}} \right)_{std} \times \left( \frac{I_{Rh}}{I_{198}} \right)_s \times \frac{(0.9176 \times M)_{spi} + (0.0716 \times M)_s}{W} \quad (4)$$
